# Supplementary material for: Electrochemical ammonia synthesis by reduction of nitrate on Au doped Cu nanowires
Source: Royal Society of Chemistry journal article supplement (doi:10.1039/d3ra00679d), 2023-01-01
Supplement: d3ra00679d1.pdf [file d3ra00679d1.pdf]

## Electronic Supplementary Information

### Electrochemical ammonia synthesis by reduction of nitrate on Au doped Cu nanowires

Yuankang Zha,<sup>ab</sup> Min Liu,<sup>a</sup> Jinlu Wang,<sup>a</sup> Jiyu Feng,<sup>a</sup> Daopeng Li,<sup>a</sup> Dongnan Zhao,<sup>a</sup>  
Shengbo Zhang,<sup>\*ab</sup> and Tongfei Shi<sup>\*ab</sup>

---

<sup>a</sup> *Key Laboratory of Materials Physics, Institute of Solid State Physics, HFIPS, Chinese Academy of Sciences, Hefei 230031, China. E-mail: tfshi@issp.ac.cn, shbzhang@issp.ac.cn.*

<sup>b</sup> *University of Science and Technology of China, Hefei 230026, China.*

## Experimental Section

**Materials.** Hydrochloric acid (HCl), ammonium persulfate  $((\text{NH}_4)_2\text{S}_2\text{O}_8)_2$ , sodium hydroxide (NaOH), ethanol ( $\text{CH}_3\text{CH}_2\text{OH}$ ), acetone ( $\text{C}_2\text{H}_6\text{O}$ ), potassium nitrate ( $\text{KNO}_3$ ), anhydrous sodium sulfate ( $\text{Na}_2\text{SO}_4$ ) were purchased from Sinopharm Chemical Reagent Co., Ltd. (China), Gold chloride trihydrate ( $\text{HAuCl}_4 \cdot 3\text{H}_2\text{O}$ ) was purchased from Aladdin Chemical Reagent CO., Ltd. (China), Cu foam was purchased from Kunshan Shengshi Jingxin New Material Co., Ltd.

**Catalyst synthesis.** In a typical procedure,  $1 \times 2 \text{ cm}^2$  copper foam was ultrasonically cleaned in hydrochloric acid, acetone and ethanol for 10 minutes to clean the surface. Next, the washed Cu foam was soaked in 0.1 M  $((\text{NH}_4)_2\text{S}_2\text{O}_8)_2$  with 2.5 M NaOH under ambient conditions for 20 min to oxidize Cu into  $\text{Cu}(\text{OH})_2$  nanowire. The synthesized  $\text{Cu}(\text{OH})_2$  nanowire was washed with deionized water and soaked in 10 mM  $\text{HAuCl}_4 \cdot 3\text{H}_2\text{O}$  solution under ambient conditions for 12 h. Next, the product was dried at  $60 \text{ }^\circ\text{C}$  in an oven for 4 h and then annealed in a flowing Ar atmosphere at  $250 \text{ }^\circ\text{C}$  for 4 h to convert it into CuO doped with Au. After annealing, an in situ electrochemical pre-reduction step was performed, which was performed with the chronopotentiometry method at  $100 \text{ mA cm}^{-2}$  for 12 h, followed by  $700 \text{ mA cm}^{-2}$  for 1 h to obtain the final Cu foam doped with Au.

**Characterization.** Scanning electron microscope (SEM) images were obtained by a field emission scanning electron microscope (FESEM SU8020). The powder X-ray diffraction (XRD) was obtained by X-ray diffractometer (Philips X-Pert Super). The  $\text{K}\alpha$  ray source was a Cu target ( $\lambda=0.15418\text{nm}$ ). X-ray photoelectron spectroscopy (XPS) was obtained by X-ray spectrometer (ESCALAB 250Xi). Transmission electron microscope (TEM) images and energy dispersive X-ray spectrum (EDS) images were obtained by a field emission transmission electron Microscope (FETEM Tecnai G2 F20). The  $^1\text{H}$  NMR (nuclear magnetic resonance) spectra were obtained using superconducting Fourier transform nuclear magnetic resonance spectrometer (Bruker Avance-400).

**Electrochemical measurements.** Electrocatalytic measurements were made in H-

type cells separated by proton exchange membranes, using the CHI 660E electrochemical Workstation (CH Instruments, Inc.) to record the electrochemical reactions. The synthesized Cu foam doped with Au was directly (effective area  $1 \times 1 \text{ cm}^2$ ), Ag/AgCl (3 M) and Pt mesh were used as working electrode, reference electrode and counter electrode respectively. There was 70 ml electrolyte (0.1 M  $\text{Na}_2\text{SO}_4$  + 10 mM  $\text{KNO}_3$ ) evenly distributed in both cathode and anode chambers. Linear sweep voltammetry (LSV) was performed at a rate of  $10 \text{ mV s}^{-1}$ . The constant potential was tested for 2 h at different potentials. In this work, all measured potentials (vs. Ag/AgCl) were transformed into the potentials vs. reversible hydrogen electrode (RHE) based on the following equation:

$$E_{\text{RHE}} = E_{\text{Ag/AgCl}} + 0.059\text{pH} + E_{\text{Ag/AgCl}}^{\circ}$$

**Determination of ammonia:** Firstly, diluted electrolyte simple to the detection range (added 0.1 mL electrolyte to a 10 mL colorimetric tube containing 9.9 mL deionized water). Subsequently, 5 00  $\mu\text{L}$  oxidizing solutions, 100  $\mu\text{L}$  colour solution and 100  $\mu\text{L}$  catalytic solution were added into the colorimetric tube in turn. The oxidizing solution was formed by mixing 5 mL of sodium hypochlorite stock solution and 45 mL of 2 M sodium hydroxide solution. The colour solution contained 0.4 M sodium salicylate and 0.32 M sodium hydroxide. The catalytic solution was an aqueous solution with a concentration of 10g/L  $\text{Na}_2[\text{Fe}(\text{CN})_5\text{NO}] \cdot 2\text{H}_2\text{O}$ . After the placement of 1 h at room temperature, the absorbance measurements were performed at wavelength of 697.5 nm. The obtained calibration curve was used to calculate the ammonia concentration.

**Determination of  $\text{NO}_3^-$ :** Firstly, diluted electrolyte simple to the detection range (added 1ml electrolyte to a 10ml colorimetric tube containing 9 mL deionized water). Subsequently, 200  $\mu\text{L}$  1 M hydrochloric acid and 20  $\mu\text{L}$  of 0.8wt% sulfamic acid solution were added into the colorimetric tube in turn. The final absorbance is calculated using the following formula:  $A = A_{220\text{nm}} - 2A_{275\text{nm}}$ . The obtained calibration curve was used to calculate the nitrate concentration.

**Determination of  $\text{NO}_2^-$ :** Firstly, diluted electrolyte simple to the detection range

(added 0.1 mL electrolyte to a 10 mL colorimetric tube containing 9.9 mL deionized water). Subsequently, 200  $\mu\text{L}$  colour solution was added into the colorimetric tube. Colour solution was a mixture of p-aminobenzenesulfonamide (4.0 g), N-(1-naphthyl) ethylenediamine dihydrochloride (0.2 g), deionized water (50 mL) and phosphoric acid (10 mL,  $\rho = 1.685 \text{ g mL}^{-1}$ ). After shaking and standing for 20 minutes, the absorbance measurements were performed at wavelength of 540 nm. The obtained calibration curve was used to calculate the nitrite concentration.

### Calculations.

*The equation of  $\text{NH}_3$  yield rate:*

$$R(\text{NH}_3)(\mu\text{g h}^{-1} \text{ cm}^{-2}) = \frac{C(\text{NH}_4^+ - \text{N})(\mu\text{g mL}^{-1}) \times V(\text{mL}) \times 17}{t(\text{h}) \times 14}$$

where  $R(\text{NH}_3)$  is the ammonia yield rate;  $C(\text{NH}_4^+ - \text{N})$  is the measured mass concentration of  $\text{NH}_4^+ - \text{N}$ ;  $V$  is the electrolyte solution volume;  $t$  is the reaction time; 14 is the molar mass of  $\text{NH}_4^+ - \text{N}$  atom; 17 is the molar mass of  $\text{NH}_3$  molecules.

*The equation of Faradaic efficiency:*

$$FE(\text{NH}_3)(\%) = \frac{8 \times n(\text{NH}_3)(\text{mol}) \times F}{Q} \times 100\%$$

where  $F$  is the Faradaic constant (96485.34);  $Q$  is the total charge during the  $\text{NO}_3^-$ RR.

*The equation of  $\text{NO}_2^-$  yield rate:*

$$R(\text{NO}_2^-)(\mu\text{g h}^{-1} \text{ cm}^{-2}) = \frac{C(\text{NO}_2^- - \text{N})(\mu\text{g mL}^{-1}) \times V(\text{mL}) \times 46}{t(\text{h}) \times 14}$$

where  $R(\text{NO}_2^-)$  is the ammonia yield rate;  $C(\text{NO}_2^- - \text{N})$  is the measured mass concentration of  $\text{NO}_2^- - \text{N}$ ;  $V$  is the electrolyte solution volume;  $t$  is the reaction time; 14 is the molar mass of  $\text{NO}_2^- - \text{N}$  atom; 46 is the molar mass of  $\text{NO}_2^-$  molecules.

*The equation of Faradaic efficiency:*

$$FE(\text{NO}_2^-)(\%) = \frac{2 \times n(\text{NO}_2^-)(\text{mol}) \times F}{Q} \times 100\%$$

where  $F$  is the Faradaic constant (96485.34);  $Q$  is the total charge during the  $\text{NO}_3^-$ RR.

**$^{15}\text{N}_2$  isotope labelling experiments.** The  $^{15}\text{N}$  isotopic labeling experiments was conducted using  $\text{K}^{15}\text{NO}_3$  (99 atom %  $^{15}\text{N}$ ) as electrolyte in 0.1 M  $\text{Na}_2\text{SO}_4$  with identical experimental procedure as that of  $\text{Na}^{14}\text{NO}_3$  experiments. The  $^1\text{H}$  NMR (nuclear magnetic resonance) spectra were obtained using superconducting Fourier

transform nuclear magnetic resonance spectrometer (Bruker Avance-400).

**Supplementary Figures**

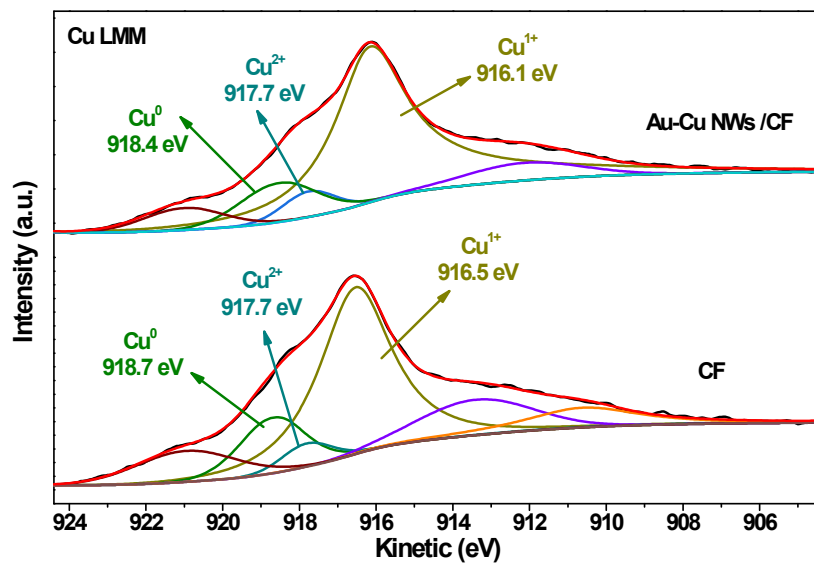

**Fig. S1** Cu *LMM* XPS spectra of Au-Cu NWs/CF and bare CF substrate.

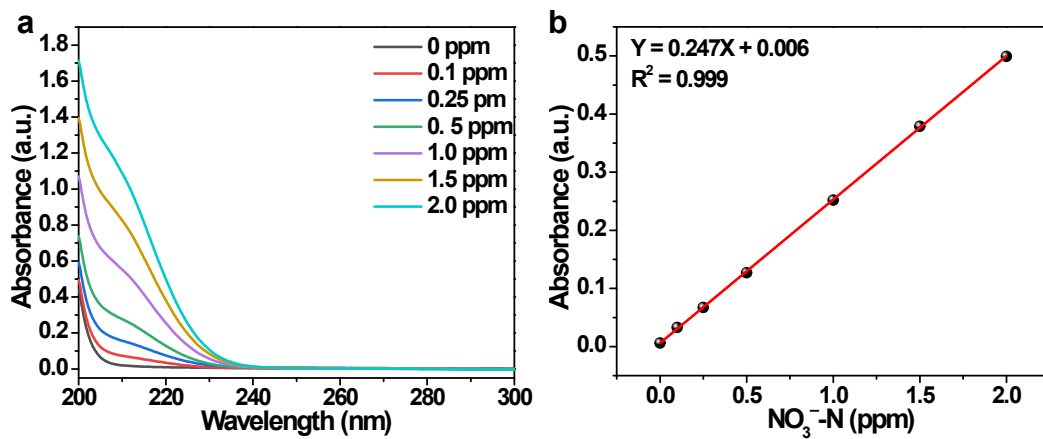

**Fig. S2** (a) UV-Vis absorption spectra of various  $\text{NO}_3^-$ -N concentrations (0, 0.1, 0.25, 0.5, 1.0, 1.5 and 2.0 ppm). (b) The calibration curve used for calculation of  $\text{NO}_3^-$ -N concentration.

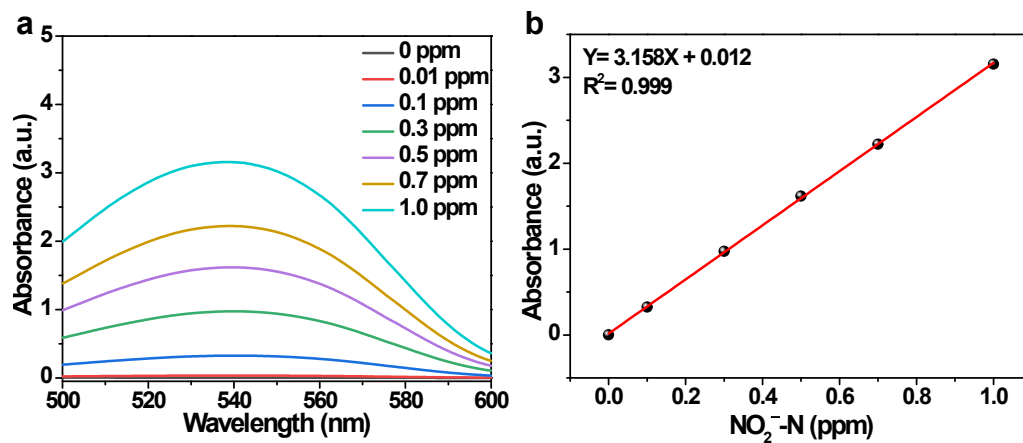

**Fig. S3** (a) UV-Vis absorption spectra of various  $\text{NO}_2^-$ -N concentrations (0, 0.1, 0.3, 0.5, 0.7 and 1.0 ppm). (b) The calibration curve used for calculation of  $\text{NO}_2^-$ -N concentration.



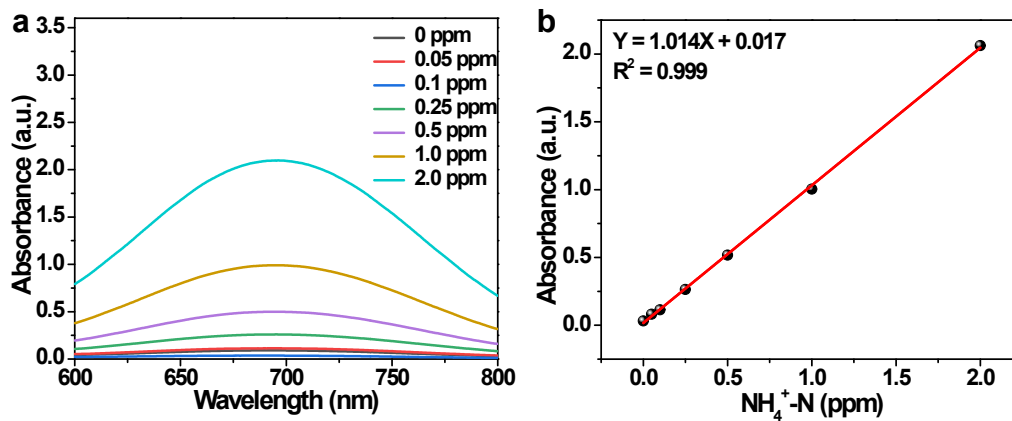

**Fig. S4** (a) UV-Vis absorption spectra of various  $\text{NH}_4^+\text{-N}$  concentrations (0, 0.05, 0.1, 0.25, 0.5, 1.0 and 2.0 ppm). (b) The calibration curve used for calculation of  $\text{NH}_4^+\text{-N}$  concentrations.

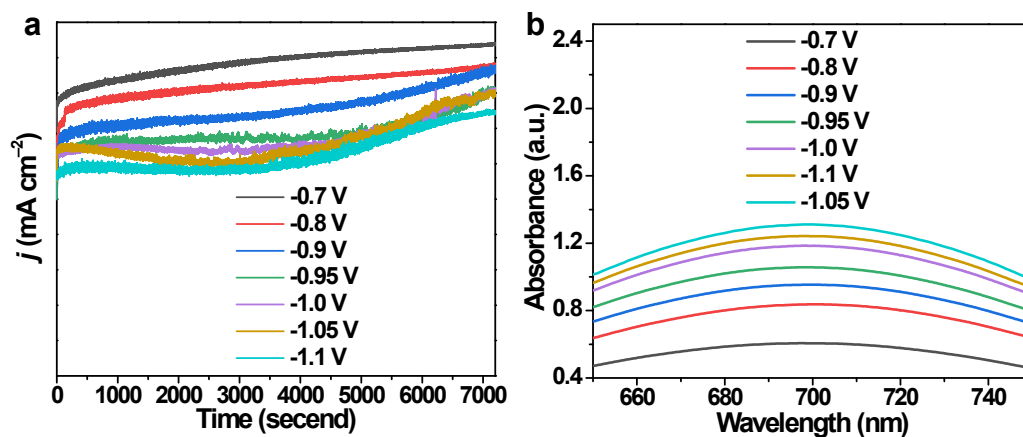

**Fig. S5** (a) Time-dependent current density curves of Au-Cu NWs/CF catalysed NO<sub>3</sub><sup>-</sup>RR at different potentials in 0.1 M Na<sub>2</sub>SO<sub>4</sub> + 10.0 mM NO<sub>3</sub><sup>-</sup> electrolyte over a 2 h period. (b) UV-Vis absorption spectra of the corresponding samples recorded in accordance with the indophenol blue method.

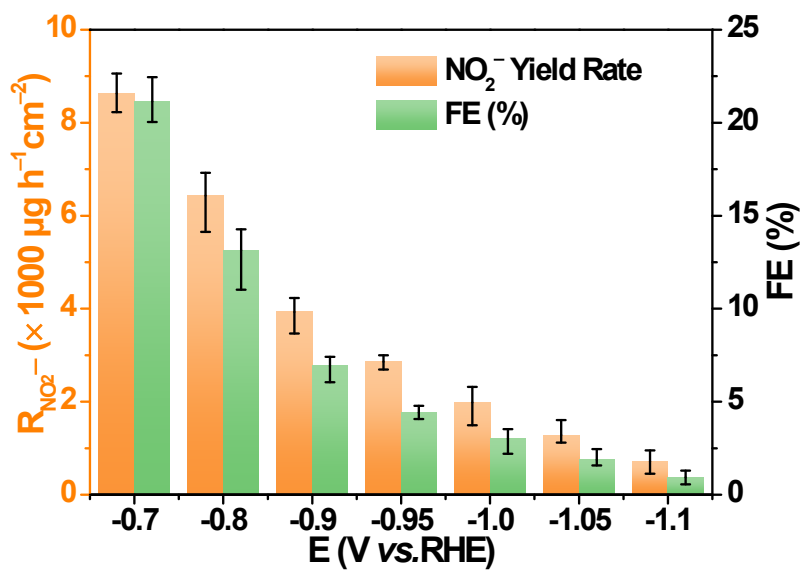

**Fig. S6**  $\text{NO}_2^-$  yield rate and faradaic efficiency of Au-Cu NWs/CF catalyst obtained at different potentials for 2 h  $\text{NO}_3^-$ RR measurement.

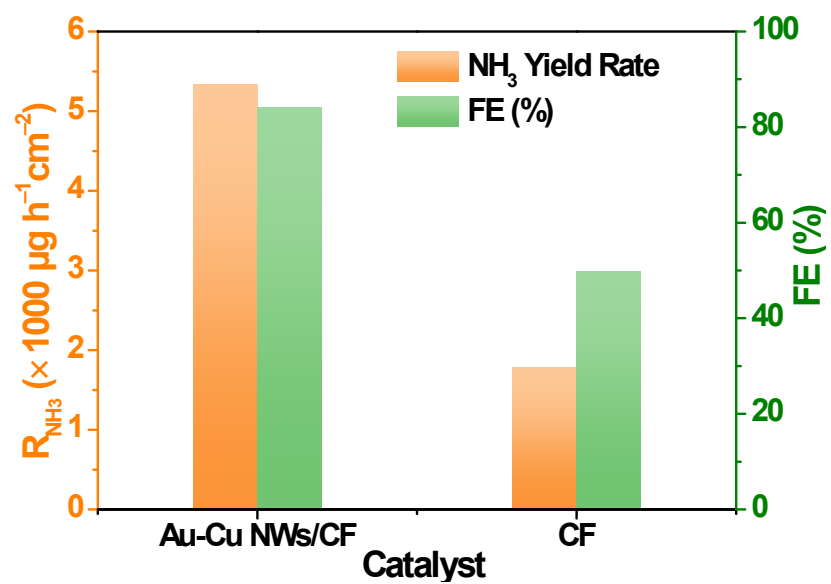

**Fig. S7** NH<sub>3</sub> yield rate and faradaic efficiency of Au-Cu NWs/CF and bare CF catalysts obtained at  $-1.05$  V (vs. RHE) for 2 h NO<sub>3</sub><sup>-</sup>RR measurement.

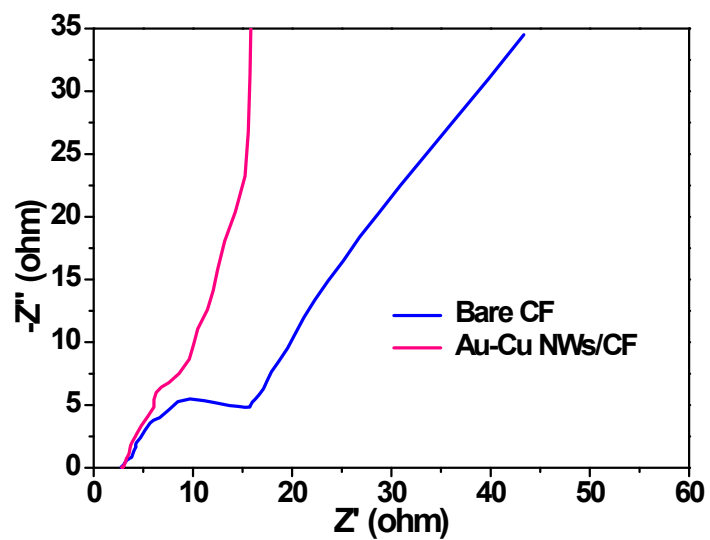

**Fig. S8** EIS profiles of bare CF substrate and Au-Cu NWs/CF in 0.1 M  $\text{Na}_2\text{SO}_4$  + 10.0 mM  $\text{KNO}_3$  solution.

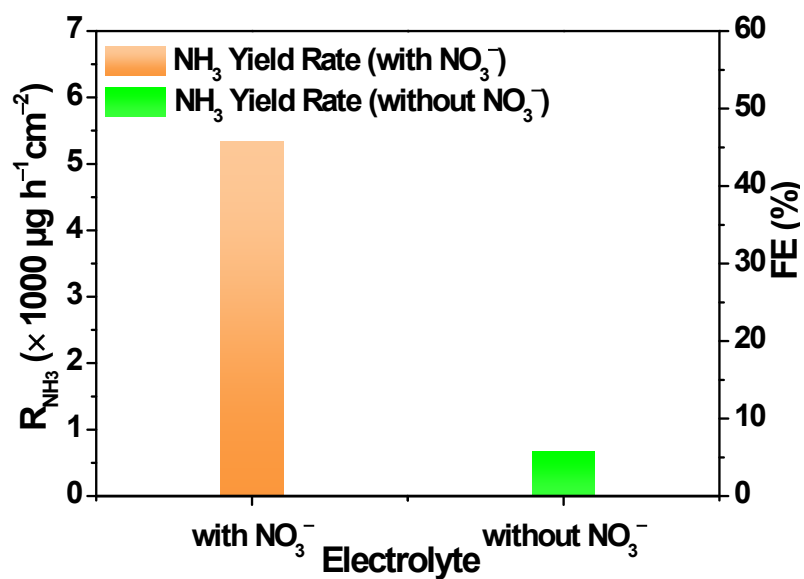

**Fig. S9** NH<sub>3</sub> yield rate and faradaic efficiency over Au-Cu NWs/CF catalysts obtained in Na<sub>2</sub>SO<sub>4</sub> electrolyte with and without nitrate at -1.05 V (vs. RHE) for 2 h NO<sub>3</sub><sup>-</sup>RR measurement.

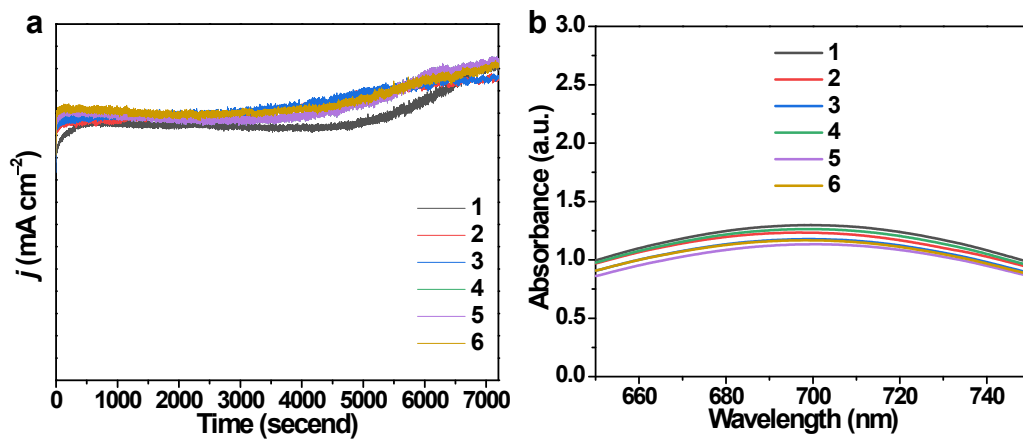

**Fig. S10** (a) Cycling stability test of Au-Cu NWs/CF in 0.1 M Na<sub>2</sub>SO<sub>4</sub> + 10.0 mM NO<sub>3</sub><sup>-</sup> electrolyte at -1.05 V (vs. RHE) for 6 cycles with 2 h NO<sub>3</sub><sup>-</sup>RR period per cycle. (b) UV-Vis absorption spectra of the corresponding samples recorded in accordance with the indophenol blue method.

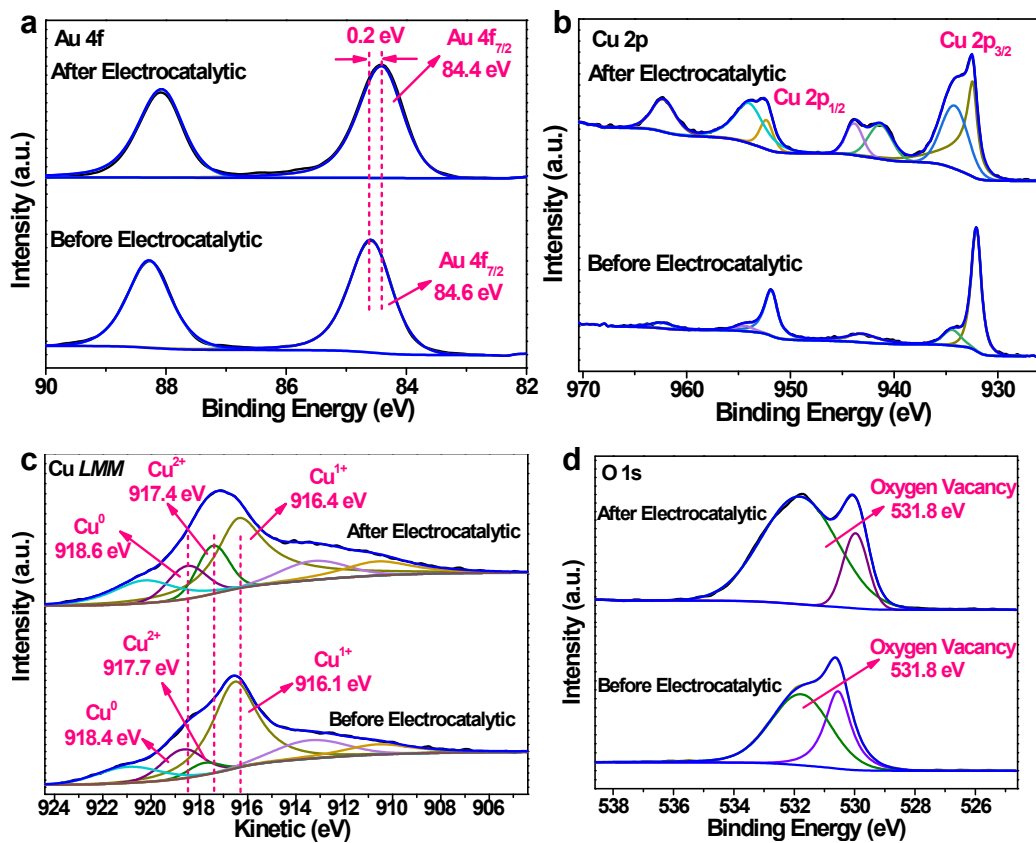

**Fig. S11** High-resolution XPS spectra of (a) Au 4f, (b) Cu 2p, (c) Cu LMM and (d) O 1s in Au-Cu NWs/CF before and after  $\text{NO}_3^-$ RR.



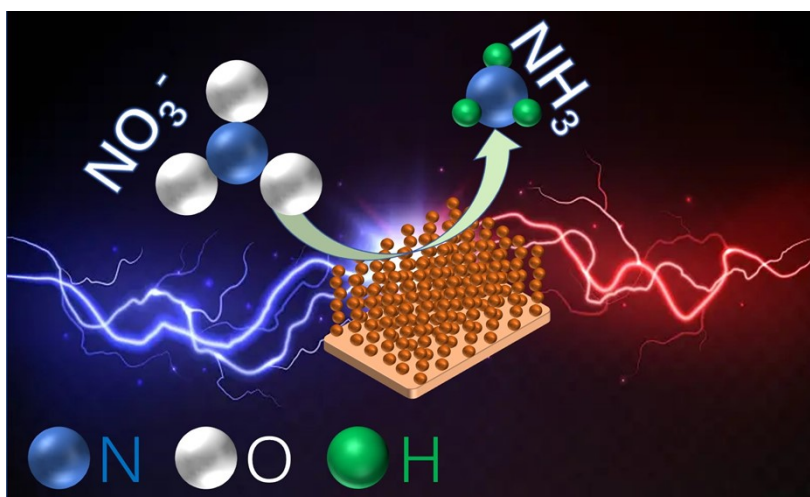

**Fig. S12.** Schematic diagram for  $\text{NO}_3^-$ RR.
